# Supplementary material
Source: publisher figshare collection journal article supplement (https://acs.figshare.com/ndownloader/files/3996721)
Supplement: Supplementary file 1 [file 3996721]

## Supporting information

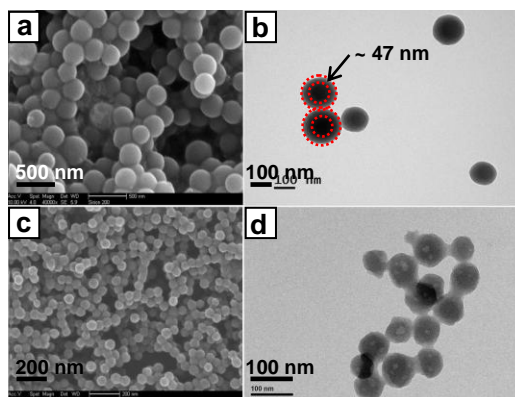

**Figure S1.** SEM and TEM images of SA@SiO<sub>2</sub> NCs with different molar ratios of PTMS:SA. (a, b) 1:1, (c, d) 1:2.5.

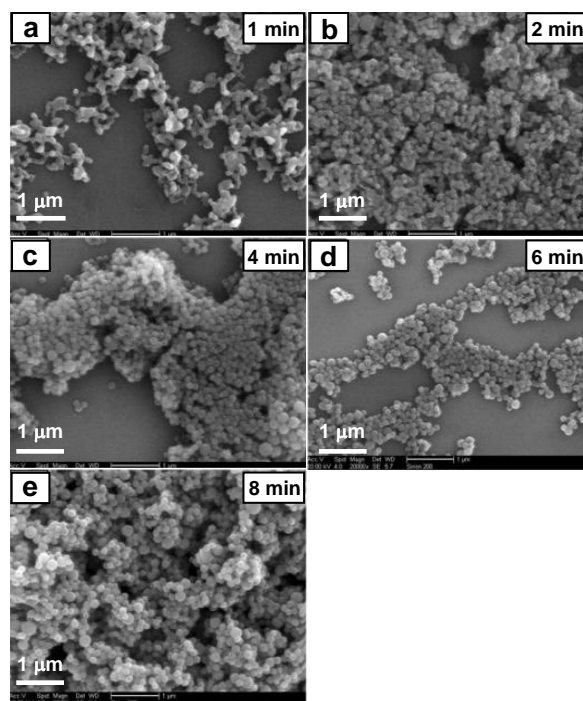

**Figure S2.** SEM images of the SA@SiO<sub>2</sub> NCs of different hydrolyze time: (a) 1, (b) 2, (c) 4, (d) 6, and (e) 8 min, respectively.

As shown in the Figure S2, the SEM images were PTMS hydrolyze reaction in the different time. When the hydrolyze time was 4 min or longer, we can achieved preferable nanocapsule with core-shell morphology. In the experimental process, at the initial stage, the clear microemulsion became muddy when PTMS added. And the stirring for 4 min, the microemulsion became transparent again, so the hydrolyze time at least was 4 min.

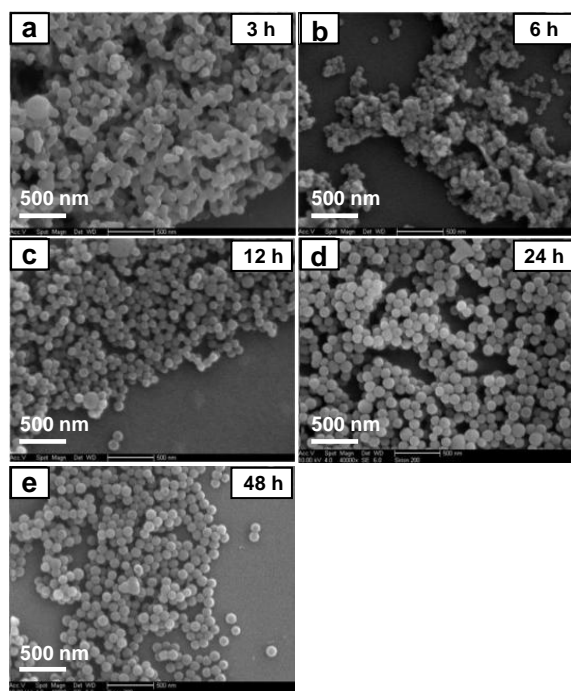

**Figure S3.** SEM images of the obtained SA@SiO<sub>2</sub> core-shell NCs with different condensation reaction time: (a) 3, (b) 6, (c) 12, (d) 24, and (e) 48h, respectively.

As shown in the Figure S3, when the condensation time was 6 h or longer, we could achieve SA@SiO<sub>2</sub> core-shell NCs with uniform sphere-like morphology, if the time was shorter than 6h, such as 3h, the stearic acid was not wrapped completely.

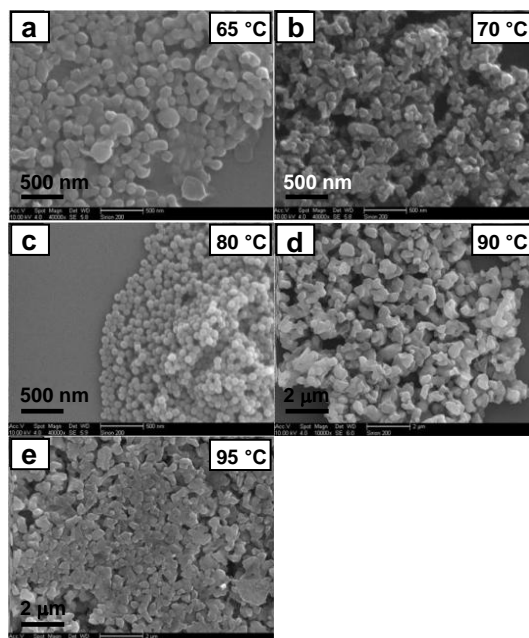

**Figure S4.** SEM images of the obtained SA@SiO<sub>2</sub> core-shell NCs with different reaction temperatures: (a) 65 °C, (b) 70 °C, (c) 80 °C, (d) 90 °C, and (e) 95 °C, respectively.

As shown in the Figure S4, the optimal reaction temperature is 80 °C. When the reaction temperature was too high or too low, the nanocapsule's morphologies were irregular spheres.

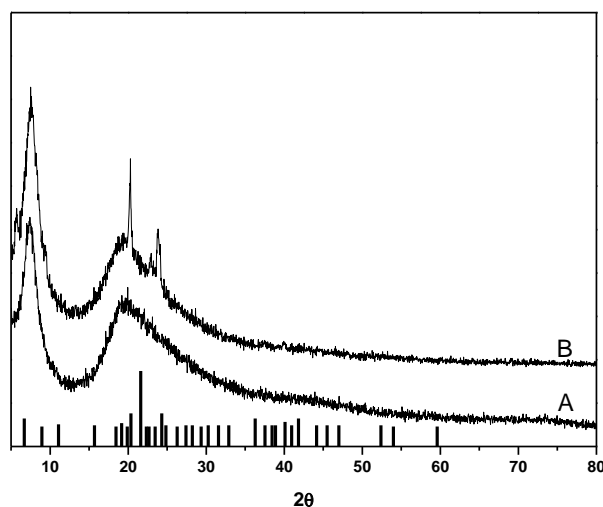

**Figure S5.** XRD patterns of (A) SiO<sub>2</sub>, (B) SA@SiO<sub>2</sub> NCs.

Figure S5 displays the XRD patterns of the core material SA, the shell material SiO<sub>2</sub> and the core-shell nanocapsule, the bottom is the SA standard card JCPDS No. 09-0618. It is evident that two broad peaks are observed in the whole range of detector angles, revealing the amorphous state of the SiO<sub>2</sub> shells. As shown in Fig. S1 B, these peaks at 2θ of 21.62 ° and 24.32 °, which can be indexed as (110), (200) reflections. These characteristic reflections suggest that the SA@SiO<sub>2</sub> NCs does not affect SA crystallization structure.

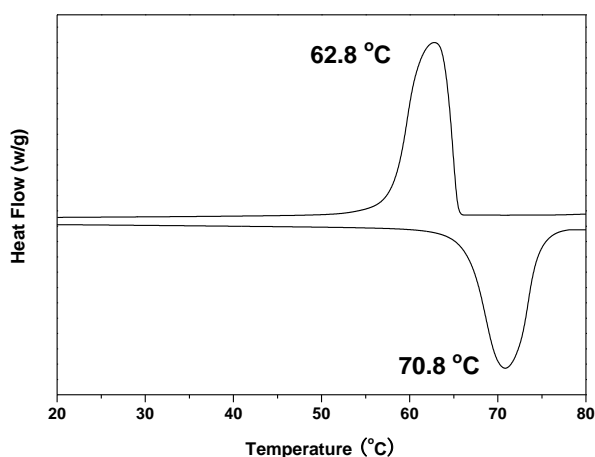

**Figure S6.** DSC curve of the bulk Stearic acid.

Figure S6 shows the DSC thermogram of bulk SA powder. It can be seen that a dominant endothermic peak centered around 70.8 °C during heating, and an exothermic peak is centered at 62.8 °C.

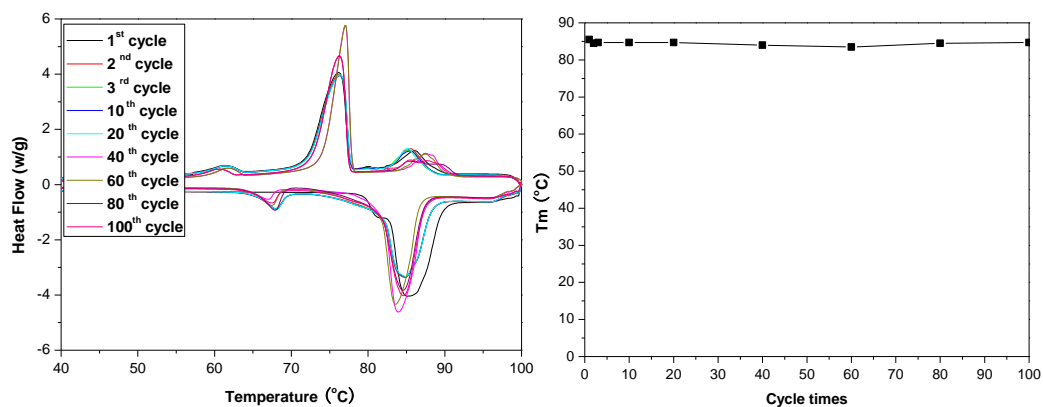

**Figure S7.** DSC thermal spectra of SA@SiO<sub>2</sub> NCs with cycling of 100 times. Those results showed that SA@SiO<sub>2</sub> NCs have good stable cycling property.

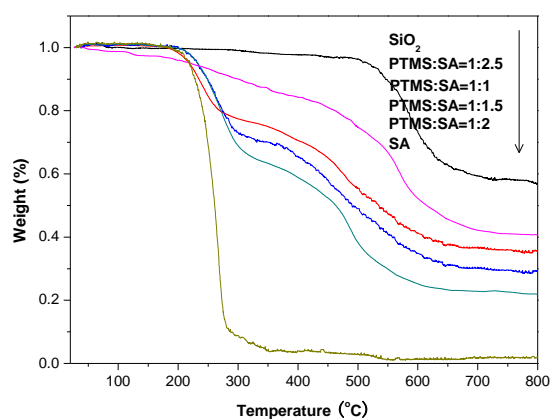

**Figure S8.** TGA of the bulk SA powers, SiO<sub>2</sub> shells and the obtained SA@SiO<sub>2</sub> NCs with different PTMS molar ratios.

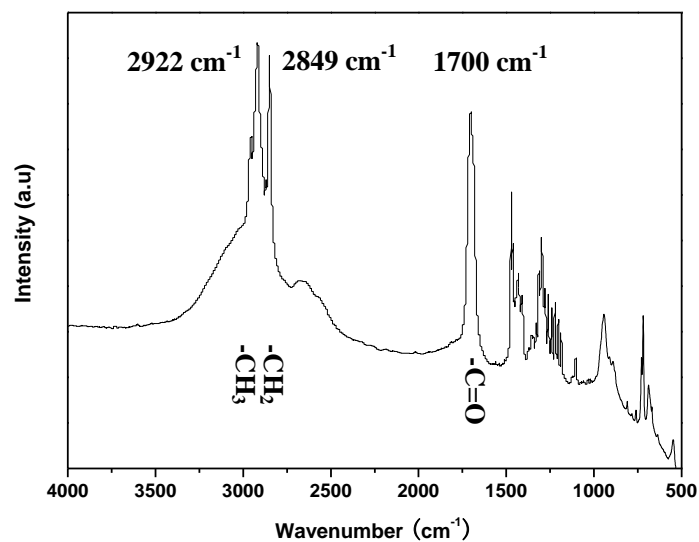

**Figure S9.** FT-IR spectrum of pure SA.
